# Supplementary material for: Giant dielectric response, nonlinear characteristics, and humidity sensing properties of a novel perovskite: Na1/3Sr1/3Tb1/3Cu3Ti4O12
Source: Royal Society of Chemistry journal article supplement (doi:10.1039/d3ra06162k), 2023-01-01
Supplement: d3ra06162k1.pdf [file d3ra06162k1.pdf]

## Supplementary Information

### Giant Dielectric Response, Nonlinear Characteristics, and Humidity Sensing Properties of a Novel Perovskite: $\text{Na}_{1/3}\text{Sr}_{1/3}\text{Tb}_{1/3}\text{Cu}_3\text{Ti}_4\text{O}_{12}$

Sirion Srilarueang <sup>a</sup>, Bundit Putasaeng <sup>b</sup>, Kaniknun Sreejivungsa <sup>a,c</sup>, Noppakorn  
Thanamoon <sup>a,b</sup>, Prasit Thongbai <sup>a,c,\*</sup>

<sup>a</sup> *Giant Dielectric and Computational Design Research Group (GD-CDR), Department of  
Physics, Faculty of Science, Khon Kaen University, Khon Kaen 40002, Thailand*

<sup>b</sup> *National Metal and Materials Technology Center, 114 Thailand Science Park, Paholyothin Road,  
Klong 1, Klong Luang, Pathumthani 12120, Thailand*

<sup>c</sup> *Institute of Nanomaterials Research and Innovation for Energy (IN-RIE), Khon Kaen University,  
Khon Kaen 40002, Thailand*

\*E-mail address: [pthongbai@kku.ac.th](mailto:pthongbai@kku.ac.th) (P. Thongbai)

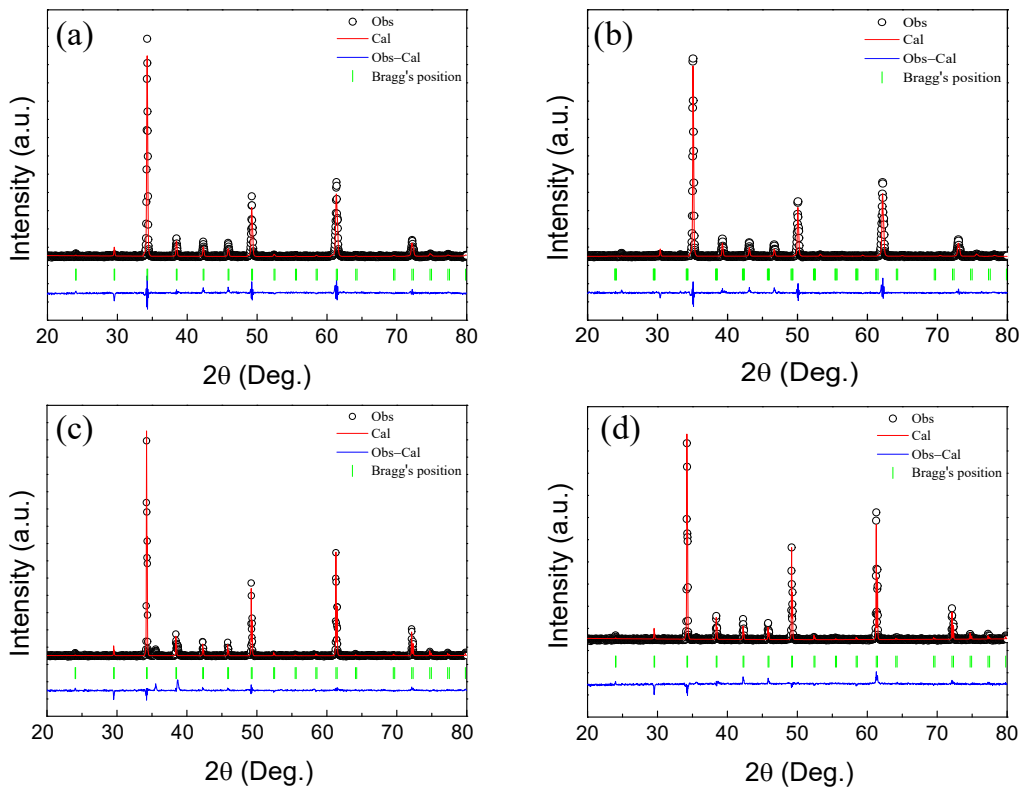

**Fig. S1** Rietveld profile fitting of [NST]CTO sintered at (a) 1020°C for 4 h, (b) 1030°C for 4 h, (c) 1040°C for 4 h, and (d) 1040°C for 8 h.

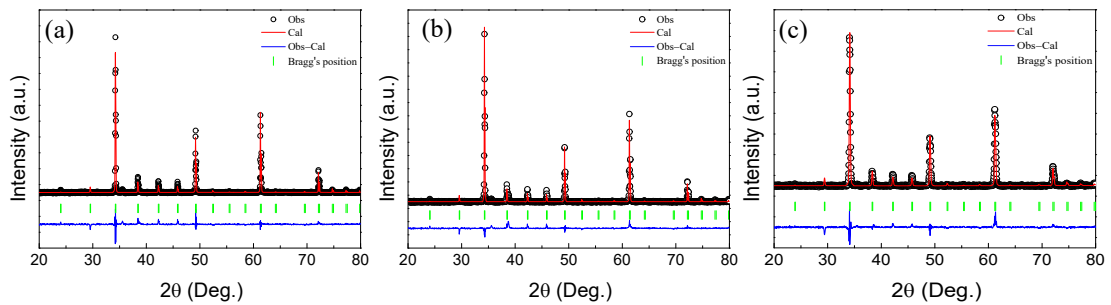

**Fig. S2** Rietveld profile fitting of [NST]CTO sintered at (a) 1050°C for 4 h, (b) 1050°C for 2 h, and (c) 1050°C for 1 h.

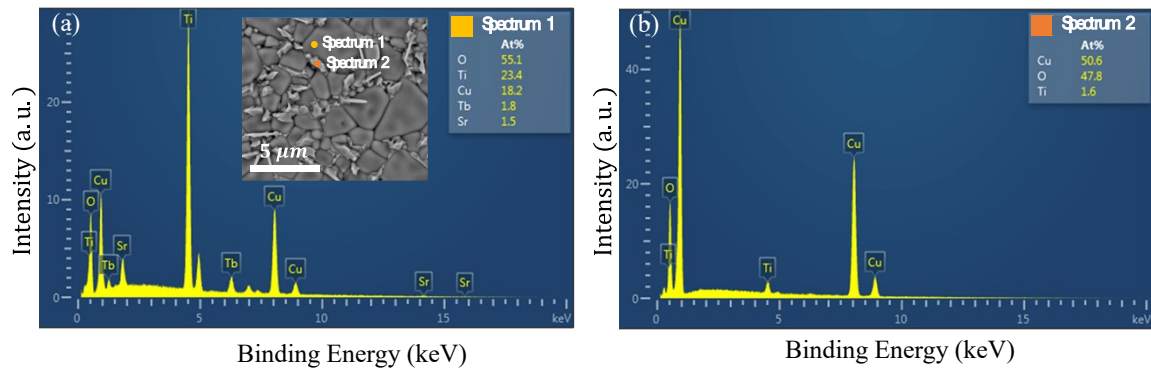

**Fig. S3** EDS spectra of [NST]CTO sintered at 1040°C for 4 h detected at (a) a regular grain and (b) rock-like grain.

The EDS spectra of [NST]CTO, sintered at 1040°C for 4 h and analyzed at both regular and rock-like grains, are showcased in Fig. S3. In the case of the regular grain (*spectrum 1*), all elements were detected in the EDS spectrum, confirming the presence of the [NST]CTO phase, with the exception of Sodium (*Na*). Contrastingly, the analysis of the rock-like grain (*spectrum 2*) revealed relatively high-intensity peaks for Copper (*Cu*) and Oxygen (*O*), indicative of the CuO phase. It is important to note that *Na* was not identified in the [NST]CTO grains. The inability to detect *Na* can be attributed to its relatively low atomic number (11), which results in weaker X-ray lines compared to elements with higher atomic numbers. This factor, at times, complicates its detection, especially in the presence of elements with substantially stronger X-ray lines where the signal might be overshadowed or suppressed. Additionally, it is plausible that *Na* might have evaporated on the sample surface during the analysis, further contributing to its non-detection in the EDS spectra.

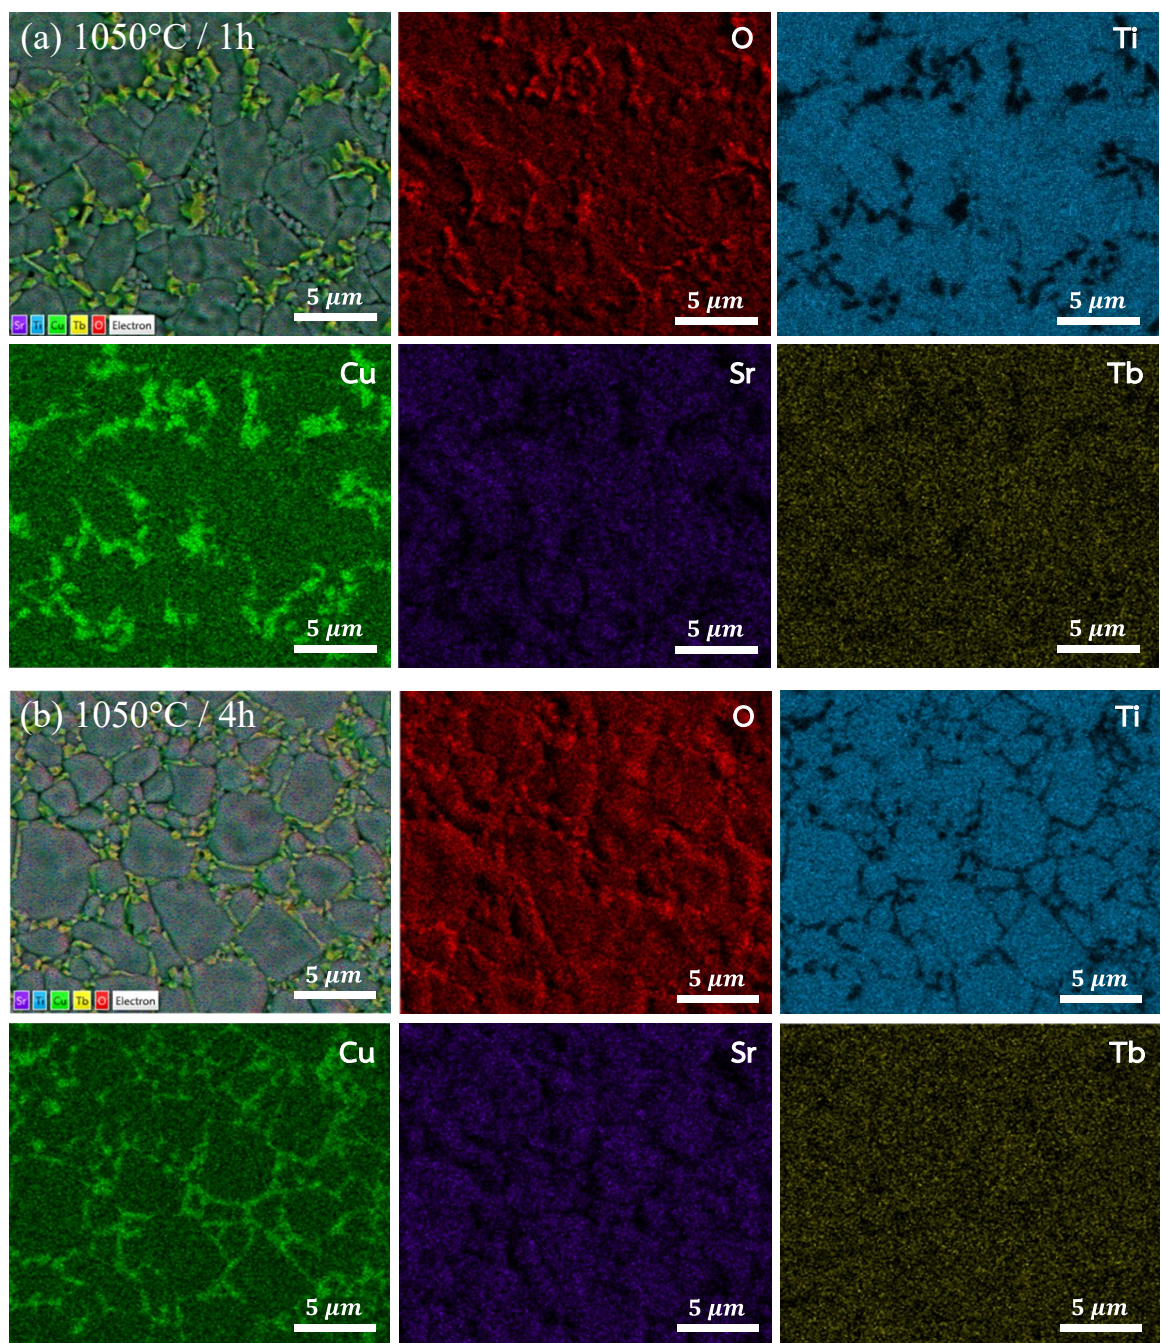

**Fig. S4** SEM-mapping images for elements of [NST]CTO sintered at (a) 1050°C for 1 h and (b) 1050°C for 4 h.

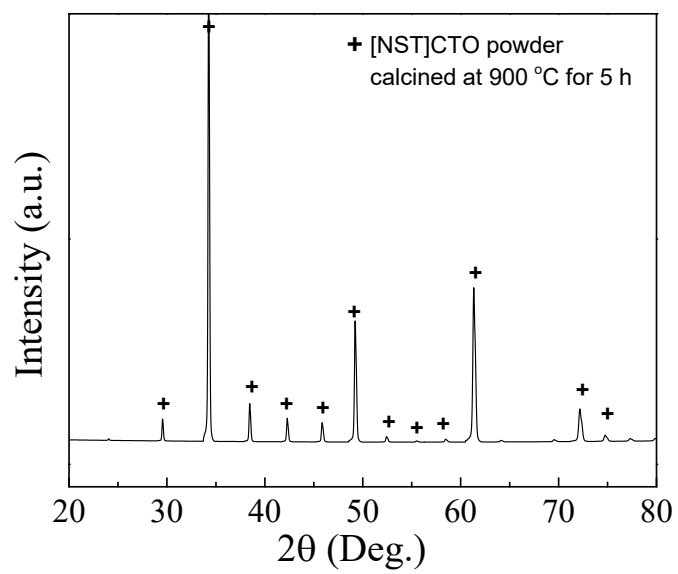

**Fig. S5** XPD pattern of [NST]CTO powder calcined at 900 °C for 5 h.
